# Supplementary material
Source: Springer Nature journal article supplement (https://www.springermedizin.de/resource/supplementary/12889_2012_5870_MOESM2_ESM.pdf/9496462)

(Intervention Clusters Only)

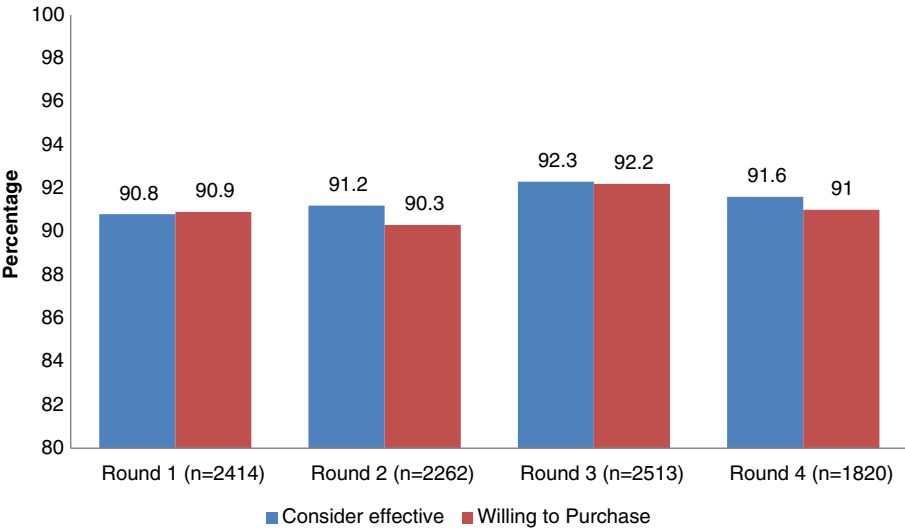

Supplement: MOESM2 [file 9496462]
